# Supplementary material
Source: publisher site journal article supplement (https://www.dovepress.com/article/611768)

**Supplementary Table S1**

Results of Shapiro-Wilk normality test for clinical and laboratory variables in patients with liver cirrhosis

| Variables | **Statistic** | ***P* value** | **Method** |
| --- | --- | --- | --- |
| Age, years | 0.990 | 0.046 | Shapiro-Wilk normality test |
| WBC, 10^9/L | 0.915 | <0.001 | Shapiro-Wilk normality test |
| NEUT, 10^9/L | 0.866 | <0.001 | Shapiro-Wilk normality test |
| LYM, 10^9/L | 0.960 | <0.001 | Shapiro-Wilk normality test |
| Hb, g/L | 0.980 | <0.001 | Shapiro-Wilk normality test |
| PLT, 10^9/L | 0.851 | <0.001 | Shapiro-Wilk normality test |
| PT, S | 0.829 | <0.001 | Shapiro-Wilk normality test |
| PT%, | 0.979 | <0.001 | Shapiro-Wilk normality test |
| INR | 0.814 | <0.001 | Shapiro-Wilk normality test |
| ALT, U/L | 0.455 | <0.001 | Shapiro-Wilk normality test |
| AST, U/L | 0.446 | <0.001 | Shapiro-Wilk normality test |
| ALB, g/L | 0.985 | 0.006 | Shapiro-Wilk normality test |
| TBil, μmol/L | 0.643 | <0.001 | Shapiro-Wilk normality test |
| DBil, μmol/L | 0.603 | <0.001 | Shapiro-Wilk normality test |
| IBil, μmol/L | 0.703 | <0.001 | Shapiro-Wilk normality test |
| ALP, U/L | 0.882 | <0.001 | Shapiro-Wilk normality test |
| GGT, U/L | 0.607 | <0.001 | Shapiro-Wilk normality test |
| BUN, mmol/L | 0.760 | <0.001 | Shapiro-Wilk normality test |
| Cr, μmol/L | 0.919 | <0.001 | Shapiro-Wilk normality test |
| UA, μmol/L | 0.954 | <0.001 | Shapiro-Wilk normality test |
| K⁺, mmol/L | 0.982 | 0.001 | Shapiro-Wilk normality test |
| Na⁺, mmol/L | 0.903 | <0.001 | Shapiro-Wilk normality test |
| Child-Pugh Score | 0.908 | <0.001 | Shapiro-Wilk normality test |
| Hepatoprotective Drugs | 0.914 | <0.001 | Shapiro-Wilk normality test |
| TBil-Day7, μmol/L | 0.559 | <0.001 | Shapiro-Wilk normality test |

**Notes:** Data are presented as Shapiro-Wilk test statistic (W) and corresponding P value. A *P* value < 0.05 indicates a significant deviation from normality. Abbreviations are provided in the Abbreviations section at the end of the main text.

**Supplementary Table S2**

Baseline Characteristics of Compensated and Decompensated Cirrhosis in the Training Cohort

| Variables | Total (n = 198) | Compensated Cirrhosis (n = 77) | Decompensated Cirrhosis (n = 121) | *P* |
| --- | --- | --- | --- | --- |
|
| International Normalized Ratio | 1.30 (1.11, 1.55) | 1.10 (1.02, 1.19) | 1.50 (1.30, 1.68) | <0.001 |
| Alanine Aminotransferase, U/L | 40.50 (26.00, 89.75) | 47.00 (27.00, 121.00) | 38.00 (26.00, 72.00) | 0.444 |
| Aspartate Aminotransferase, U/L | 53.00 (33.25, 123.75) | 48.00 (27.00, 90.00) | 60.00 (36.00, 128.00) | 0.022 |
| Total Bilirubin, μmol/L | 34.95 (21.07, 88.60) | 20.70 (16.50, 28.30) | 65.50 (35.30, 123.50) | <0.001 |
| Direct Bilirubin​, μmol/L | 15.50 (8.50, 37.73) | 8.10 (6.10, 12.00) | 29.00 (15.50, 81.40) | <0.001 |
| TBil-Day7, μmol/L | 30.50 (17.65, 69.30) | 16.70 (13.20, 26.70) | 50.40 (28.80, 108.40) | <0.001 |

**Notes:** Due to skewed distributions, all variables are shown as median (Q₁, Q₃) and between‑group comparisons were performed using the Mann‑Whitney U test.

**Supplementary Table S3**

Baseline Characteristics of Compensated and Decompensated Cirrhosis in the Internal Validation Cohort

| Variables | Total (n = 86) | Compensated Cirrhosis (n = 26) | Decompensated Cirrhosis (n = 60) | *P* |
| --- | --- | --- | --- | --- |
|
| International Normalized Ratio | 1.29 (1.14, 1.55) | 1.10 (1.04, 1.15) | 1.40 (1.27, 1.67) | <0.001 |
| Alanine Aminotransferase, U/L | 40.50 (23.00, 89.50) | 42.50 (27.00, 101.25) | 38.50 (22.50, 86.50) | 0.800 |
| Aspartate Aminotransferase, U/L | 48.50 (32.25, 97.75) | 37.00 (27.00, 61.75) | 54.00 (36.00, 123.00) | 0.028 |
| Total Bilirubin, μmol/L | 41.65 (21.42, 83.60) | 17.65 (13.53, 23.95) | 62.55 (39.35, 106.57) | <0.001 |
| Direct Bilirubin​, μmol/L | 19.35 (7.95, 37.58) | 6.60 (5.53, 9.88) | 30.40 (16.05, 54.88) | <0.001 |
| TBil-Day7, μmol/L | 31.80 (19.27, 58.63) | 16.05 (12.88, 20.85) | 48.85 (30.90, 73.12) | <0.001 |

**Notes:** Due to skewed distributions, all variables are shown as median (Q₁, Q₃) and between‑group comparisons were performed using the Mann‑Whitney U test.

**Supplementary Table S4**

Predictors and Coefficients Selected by LASSO Regression

| Variables | Coefficient |
| --- | --- |
|
| International Normalized Ratio | 3.058309 |
| Aspartate Aminotransferase, U/L | 12.743976 |
| Total Bilirubin, μmol/L | 58.733134 |
| Direct Bilirubin​, μmol/L | 33.499165 |

**Supplementary Table S5**

Comparison of predicted vs. actual TBil-Day7 in 10 randomly selected patients from the internal validation cohort

| Patient ID | Actual | Predicted | Absolute Error | Relative Error (%) |
| --- | --- | --- | --- | --- |
| 6 | 47.4 | 48.69 | 1.29 | 2.7 |
| 50 | 81.4 | 83.47 | 2.07 | 2.5 |
| 76 | 19.5 | 14.94 | 4.56 | 23.4 |
| 41 | 12.4 | 6.24 | 6.16 | 49.7 |
| 85 | 46.3 | 47.89 | 1.59 | 3.4 |
| 17 | 54.8 | 48.70 | 6.10 | 11.1 |
| 32 | 31.6 | 43.07 | 11.47 | 36.3 |
| 70 | 394.0 | 503.73 | 109.73 | 27.9 |
| 79 | 12.8 | 7.94 | 4.86 | 38.0 |
| 8 | 99.0 | 113.49 | 14.49 | 14.6 |

**Supplementary Figure S1** Internal validation calibration curve (deciles). Observed means closely align with the diagonal line, demonstrating good calibration without systematic bias.


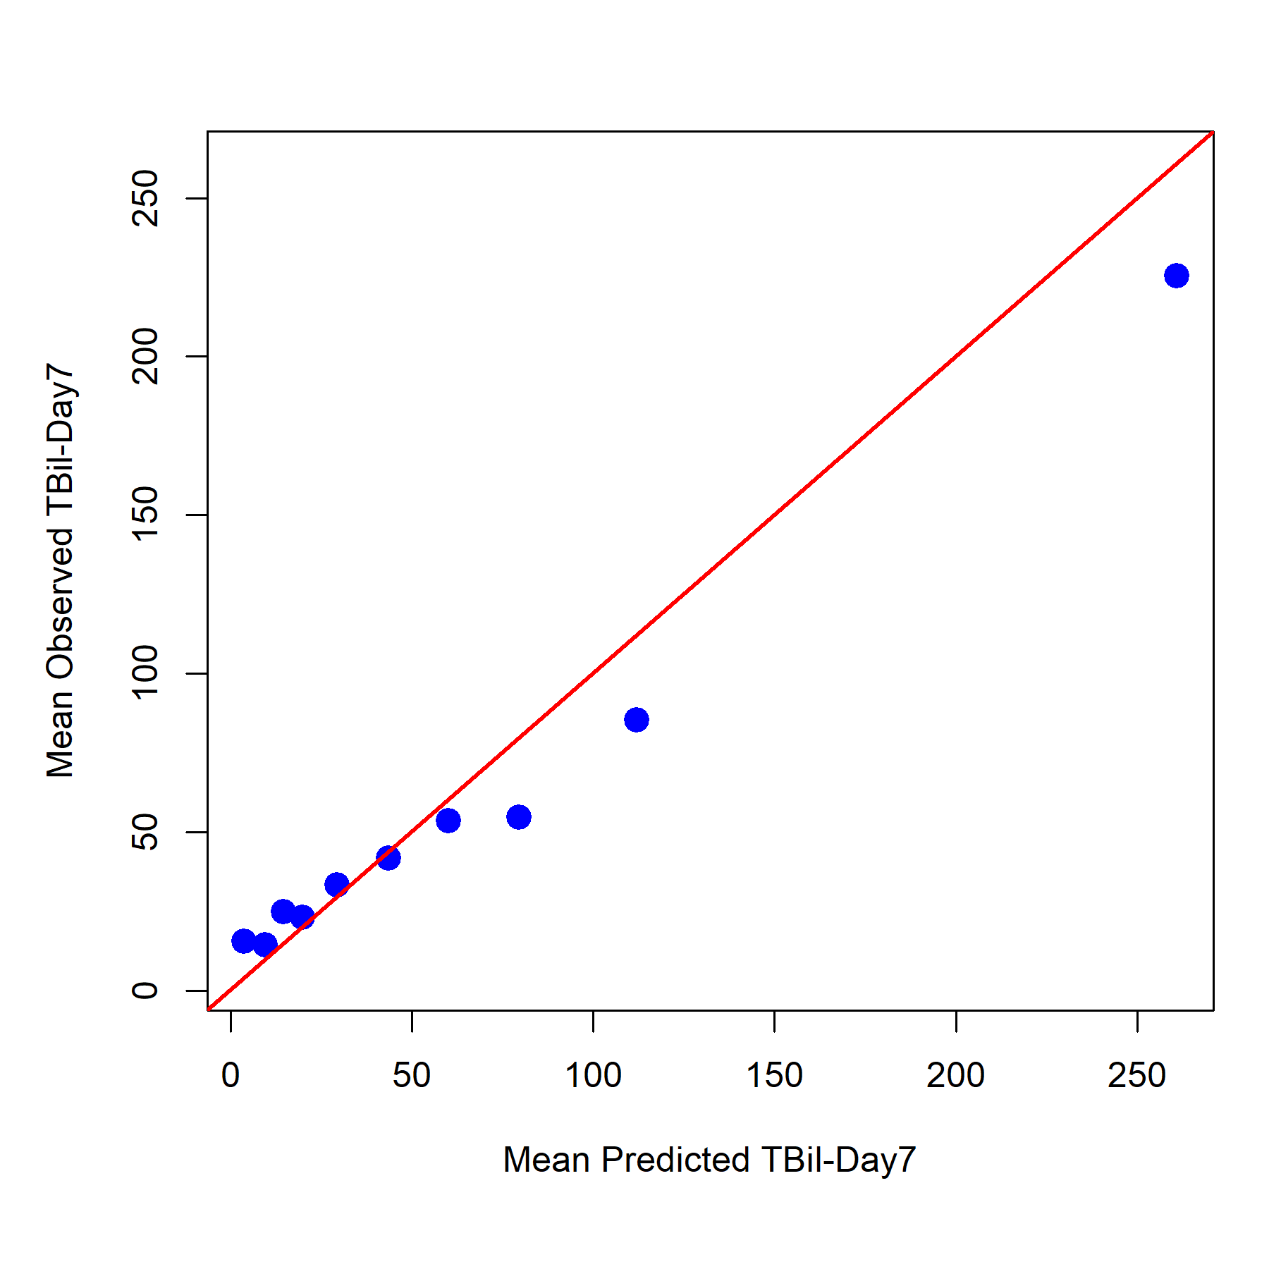

Supplement: Supplementary file 1 [file 611768_Appendix%20Supplementary%20Documents_1.docx]
